# Supplementary material for: The Immunogenicity of DENV1–4 ED3s Strongly Differ despite Their Almost Identical Three-Dimensional Structures and High Sequence Similarities
Source: MDPI journal article supplement (doi:10.3390/ijms24032393), 2023-01-25
Supplement: s1 [file s1]

# Supplementary Data:

**Table S1.** Sequence and structural similarities among DEN ED3s.

|           | DENV1 ED3 | DENV2 ED3           | DENV3 ED3 | DENV4 ED3 |
|-----------|-----------|---------------------|-----------|-----------|
| DENV1 ED3 | -         | 0.78 Å <sup>a</sup> | 0.89 Å    | 0.98 Å    |
| DENV2 ED3 | 62.9%     | -                   | 0.69 Å    | 0.68 Å    |
| DENV3 ED3 | 70.5%     | 59.1%               | -         | 1.04 Å    |
| DENV4 ED3 | 55.2%     | 60.0%               | 51.4%     | -         |

<sup>a</sup> The numbers in the right top half and bottom left half correspond to the C-RMSD and percentage identity of two ED3 serotypes.

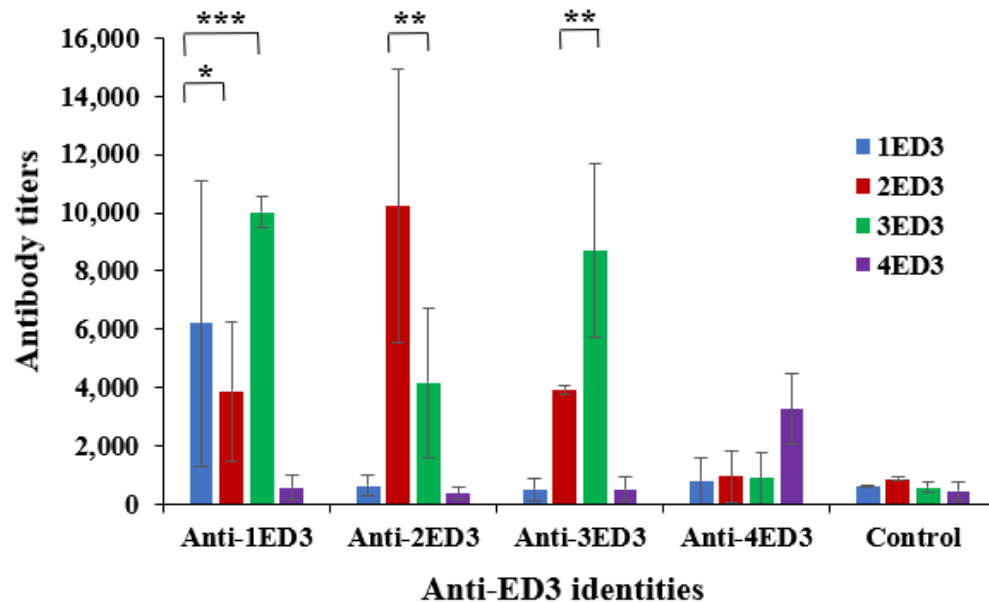

**Figure S1. Anti-ED3 IgG antibody responses in Swiss Albino mice.** This mice group was injected with four different ED3s as in Balb/c mice mentioned in results section. Here, the anti-ED3 IgG antibody responses on day 28 are shown. The results were similar as observed in the Balb/c mouse group. Asterisks represent the comparisons using Dunnett's multiple comparison test; \*\*p<0.001, \*\*p<0.001 and \*\*\*p<0.0001.

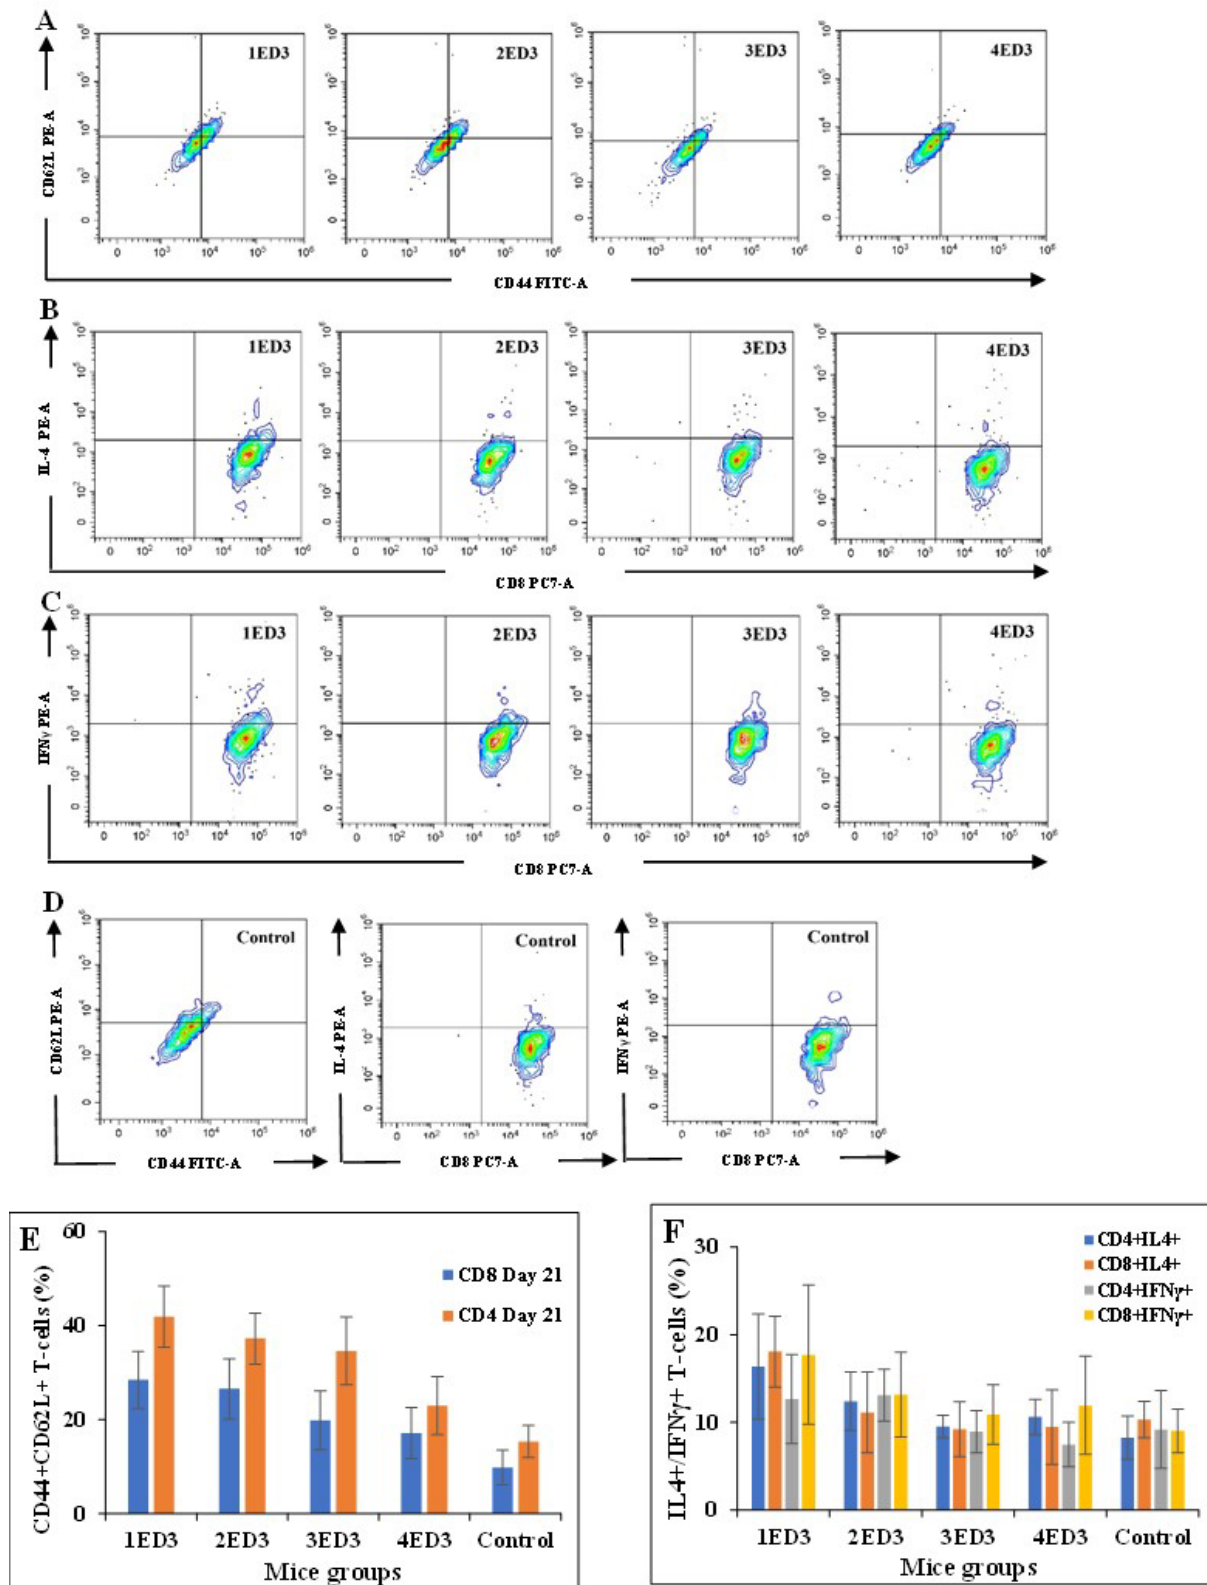

**Figure S2. Effects of ED3 immunization on T-cell memory status in Balb/c mice.** The CD44-CD62L co-expression at day 21 (A), IL-4 expression at day 14 (B) and IFN- $\gamma$  expression at day 14

(C) by T<sub>C</sub>-cells are shown. Expression of CD44/CD62L, IL-4 and IFN- $\gamma$  in unimmunized control mice (D). The relative percentages of CD44+CD62L+T-cells, and percentages of T-cells expressing IL-4 and IFN- $\gamma$  in ED3 immunized mice are shown in panels (E) and (F), respectively.

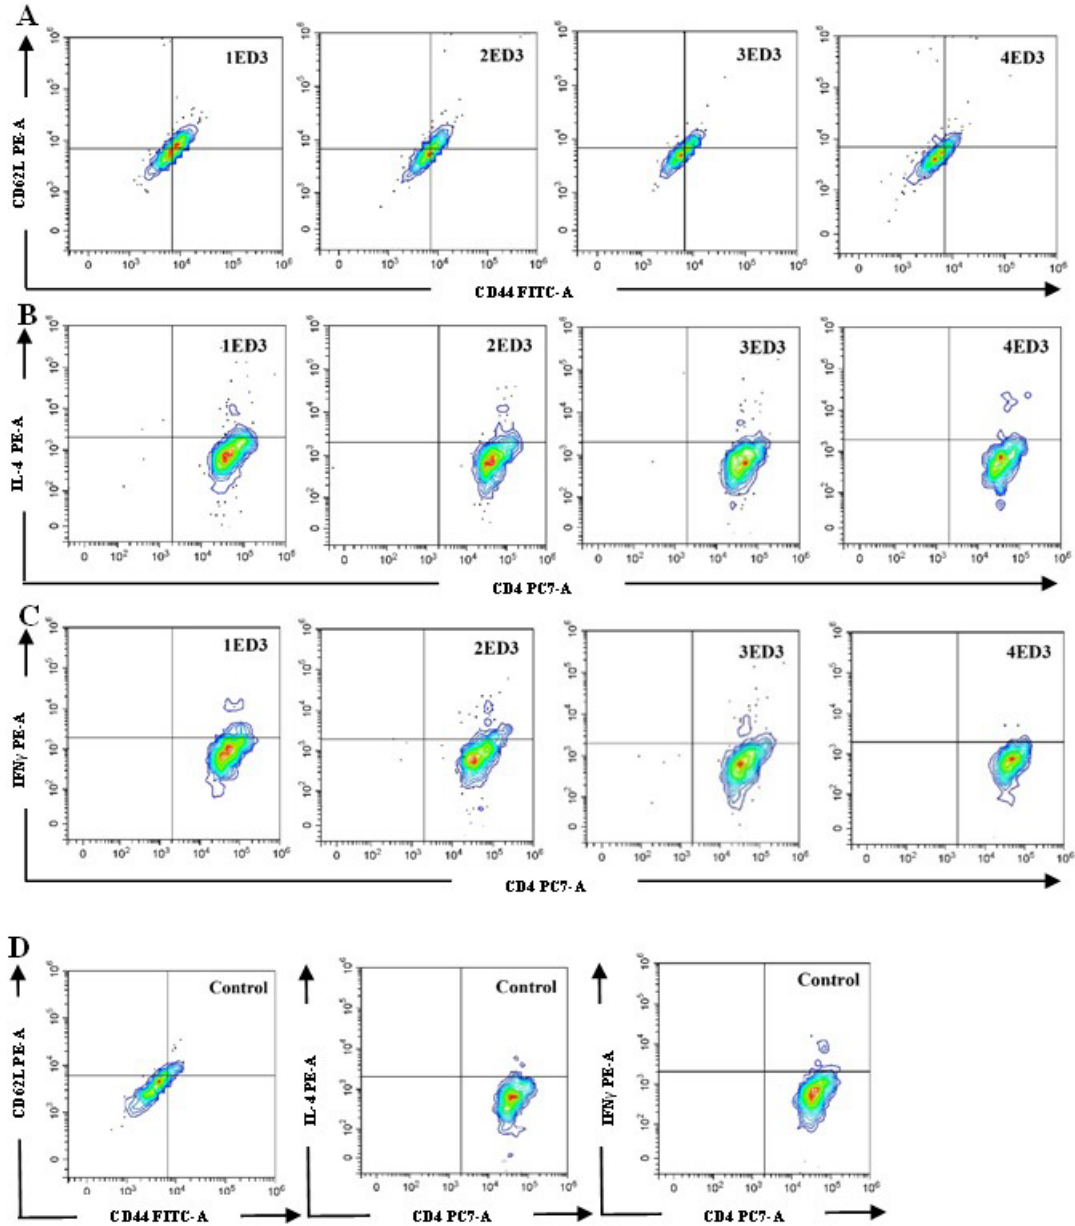

**Figure S3. Effects of ED3 immunization on T-cell memory status in Balb/c mice.** The CD44-CD62L co-expression at day 21 (A), IL-4 expression at day 14 (B) and IFN- $\gamma$  expression at day 14 (C) by T<sub>H</sub>-cells are shown. Expression of CD44/CD62L, IL-4 and IFN- $\gamma$  in unimmunized control mice (D).

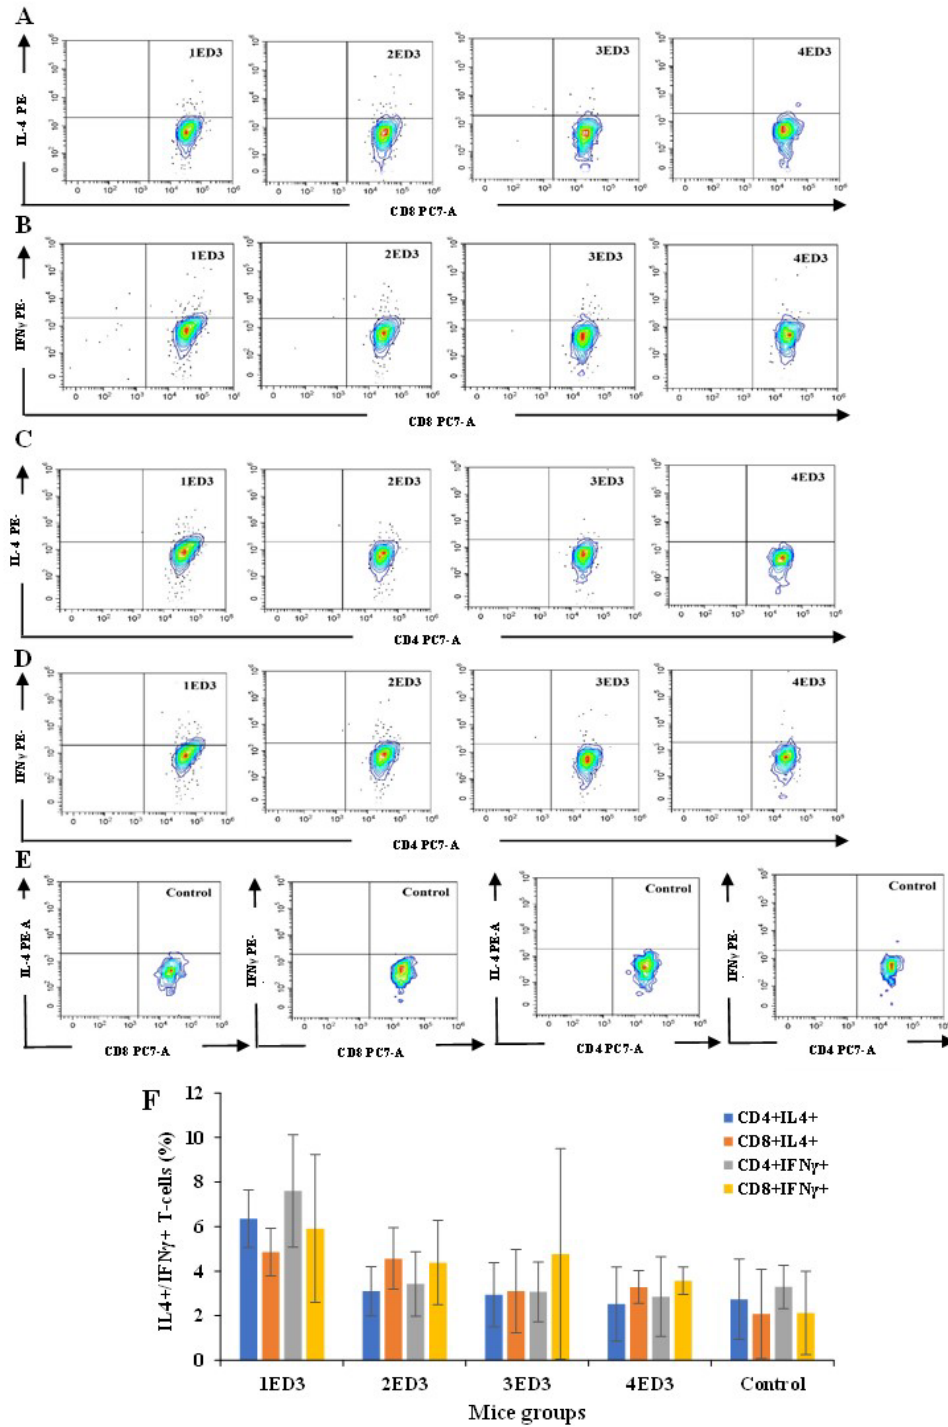

**Figure S4. Effects of ED3 immunization on T-cell memory status in Balb/c mice.** IL-4 expression (A) and IFN- $\gamma$  expression (B) by T<sub>H</sub>-cells and IL-4 expression (C) and IFN- $\gamma$  expression (D) by T<sub>H</sub>-cells at day 21 are shown. Expression of IL-4 and IFN- $\gamma$  in unimmunized control mice (E). The relative percentages of CD44<sup>+</sup>CD62L<sup>+</sup>T-cells, and percentages of T-cells expressing IL-4 and IFN- $\gamma$  in ED3 immunized mice are shown in panel (F).

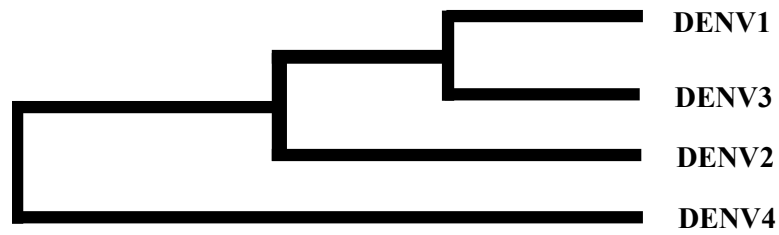

**Figure S5. Phylogenetic tree topology of DENVs based on the ED3 sequences analyzed by maximum likelihood using CLUSTAL W [22].** Amino acid sequences of the four serotypes were used to reconstruct the phylogenetic tree and ancestral sequences.
